# Supplementary material for: High Non-Cardiac Death Incidence Should Be a Limitation of Drug-Eluting Stents Implantation? Insights from Recent Randomized Data
Source: Diagnostics (Basel). 2023 Apr 2;13(7):1321. doi: 10.3390/diagnostics13071321 (PMC10093159; doi:10.3390/diagnostics13071321)
Supplement: Supplementary file 1 [file diagnostics-13-01321-s001.zip › diagnostics-2228268-supplementary.pdf]

**Table S1: Randomized studies reporting high incidence of non-cardiac death or cancer.**

|                   | Design        | Comparator                                  | Patients |                                                                                                                                                             |           | Reference |
|-------------------|---------------|---------------------------------------------|----------|-------------------------------------------------------------------------------------------------------------------------------------------------------------|-----------|-----------|
| BIOSCIENCE        | RCT           | DES3 vs DES2                                | 2119     | Target lesion failure                                                                                                                                       | 5 years   | [3]       |
| ISCHEMIA          | RCT           | Invasive (74% DES/26% CABG) vs OMT          | 5179     | Composite of death from cardiovascular causes, myocardial infarction, or hospitalization for unstable angina, heart failure, or resuscitated cardiac arrest | 3.2 years | [5]       |
| ISCHEMIA EXTENDED | RCT           | Invasive (74% DES2/26% CABG) vs OMT         | 4825     | Death, cardiovascular death, non-cardiac death                                                                                                              | 5.7 years | [7]       |
| REVIVED           | RCT           | DES2/3 vs OMT                               | 700      | Death from any cause or hospitalization for heart failure                                                                                                   | 3.4 years | [6]       |
| EXCEL             | RCT           | DES2 vs CABG                                | 1905     | Any cause of death+ stoke +myocardial infarction                                                                                                            | 5 years   | [4]       |
| Nordmann et al    | Meta-analysis | DES1 vs BMS                                 | 8221     | Death, cardiovascular death, non-cardiac death                                                                                                              | 4 years   | [11]      |
| Gaudino et al     | Meta-analysis | BMS vs CABG<br>DES1 vs CABG<br>DES2 vs CABG | 13620    | Death, cardiovascular death, non-cardiac death                                                                                                              | 5 years   | [16]      |

RCT: randomized clinical trials, DES3: third generation drug eluting stent, DES2: second generation drug eluting stent, CABG: coronary artery bypass surgery, OMT: optimal medical treatment, BMS: bare metal stents, DES1: first generation drug eluting stents.
